# Supplementary material
Source: Research Square preprint supplement (doi:10.21203/rs.3.rs-10020208/v1)
Supplement: Supplementary file 1 [file c43aef16c46154a6ef7eb262.xlsx]

## Sheet: FARMER SURVEY DATA (n=81)
ID	Village	Sex	Age	Education	Marital_Status	HHSize	Farming_Exp	Sesame_Exp	Land_Area_ha	Yield_kg	Quantity_Sold_kg	Price_MK	Revenue_MK	Production_Cost_MK	Gross_Margin_MK	Buyer_Type	Payment_Terms	Bargaining_Power	Extension_Access	Storage_Months
F01	Mwenechanda	F	34	Secondary	Married	5	12	5	0.8	520	42	1400	58800	25000	33800	Middleman	Cash	Low	No	0
F02	Mwenechanda	F	42	Primary	Widowed	7	20	8	1.2	650	78	1350	105300	32000	73300	Middleman	Cash	Low	No	1
F03	Mwenechanda	M	28	Secondary	Single	3	6	3	0.5	480	24	1450	34800	18000	16800	Farm gate	Cash	Medium	Yes	0
F04	Lupembe	F	45	Primary	Married	6	18	10	1	580	58	1400	81200	28000	53200	Middleman	Cash	Low	No	2
F05	Lupembe	F	38	Secondary	Married	4	15	6	0.7	510	36	1500	54000	22000	32000	Middleman	Cash	Low	Yes	0
F06	Lupembe	M	52	Primary	Married	8	25	12	1.5	620	93	1300	120900	38000	82900	Wholesaler	Cash	Medium	No	3
F07	Kaseye	F	31	Secondary	Married	5	8	4	0.6	490	29	1550	44950	19000	25950	Middleman	Cash	Low	No	0
F08	Kaseye	F	29	Primary	Single	2	7	3	0.4	450	18	1600	28800	15000	13800	Farm gate	Cash	Low	Yes	0
F09	Kaseye	M	41	Secondary	Married	6	16	8	0.9	540	49	1450	71050	25000	46050	Middleman	Cash	Medium	No	1
F10	Mwenechanda	F	36	Primary	Married	5	14	6	0.7	500	35	1500	52500	22000	30500	Middleman	Cash	Low	No	0
F11	Mwenechanda	M	33	Secondary	Married	4	10	5	0.8	530	42	1400	58800	24000	34800	Middleman	Cash	Medium	Yes	0
F12	Lupembe	F	47	Primary	Widowed	6	22	12	1.1	600	66	1350	89100	32000	57100	Wholesaler	Cash	Low	No	2
F13	Lupembe	F	39	Secondary	Married	5	16	7	0.8	520	42	1500	63000	24000	39000	Middleman	Cash	Low	No	0
F14	Kaseye	M	44	Primary	Married	7	18	9	1	560	56	1400	78400	28000	50400	Middleman	Cash	Medium	Yes	1
F15	Kaseye	F	27	Secondary	Single	3	5	2	0.4	440	18	1600	28800	15000	13800	Farm gate	Cash	Low	No	0
F16	Mwenechanda	F	35	Primary	Married	5	12	5	0.7	510	36	1500	54000	22000	32000	Middleman	Cash	Low	No	0
F17	Mwenechanda	M	48	Primary	Married	8	20	10	1.2	630	76	1350	102600	34000	68600	Wholesaler	Cash	Medium	No	2
F18	Lupembe	F	32	Secondary	Married	4	9	4	0.6	490	29	1550	44950	19000	25950	Middleman	Cash	Low	Yes	0
F19	Lupembe	F	41	Primary	Married	6	17	8	0.9	540	49	1450	71050	26000	45050	Middleman	Cash	Low	No	1
F20	Kaseye	M	37	Secondary	Married	5	14	6	0.8	530	42	1400	58800	24000	34800	Middleman	Cash	Medium	Yes	0
F21	Kaseye	F	43	Adult Lit	Married	6	18	9	1	570	57	1400	79800	28000	51800	Middleman	Cash	Low	No	1
F22	Mwenechanda	F	26	Secondary	Single	2	4	2	0.4	430	17	1600	27200	15000	12200	Farm gate	Cash	Low	Yes	0
F23	Mwenechanda	M	51	Primary	Married	7	24	12	1.3	640	83	1300	107900	36000	71900	Wholesaler	Cash	Medium	No	3
F24	Lupembe	F	38	Secondary	Married	5	15	6	0.7	520	36	1500	54000	22000	32000	Middleman	Cash	Low	No	0
F25	Lupembe	F	44	Primary	Widowed	6	19	9	1	580	58	1400	81200	28000	53200	Middleman	Cash	Low	No	1
F26	Kaseye	M	30	Secondary	Married	4	8	4	0.6	500	30	1500	45000	19000	26000	Middleman	Cash	Medium	Yes	0
F27	Kaseye	F	49	Primary	Married	7	21	10	1.1	600	66	1350	89100	32000	57100	Wholesaler	Cash	Low	No	2
F28	Mwenechanda	F	33	Secondary	Married	5	11	5	0.7	510	36	1500	54000	22000	32000	Middleman	Cash	Low	No	0
F29	Mwenechanda	M	40	Primary	Married	6	15	7	0.9	540	49	1450	71050	26000	45050	Middleman	Cash	Medium	Yes	1
F30	Lupembe	F	35	Secondary	Married	4	12	5	0.7	510	36	1500	54000	22000	32000	Middleman	Cash	Low	No	0
F31	Lupembe	F	46	Primary	Married	6	20	9	1	570	57	1400	79800	28000	51800	Middleman	Cash	Low	No	1
F32	Kaseye	M	29	Secondary	Single	3	7	3	0.5	470	24	1550	37200	17000	20200	Farm gate	Cash	Medium	Yes	0
F33	Kaseye	F	42	Primary	Married	7	18	8	1	560	56	1400	78400	28000	50400	Middleman	Cash	Low	No	1
F34	Mwenechanda	F	37	Secondary	Married	5	14	6	0.8	530	42	1400	58800	24000	34800	Middleman	Cash	Low	No	0
F35	Mwenechanda	M	53	Primary	Married	8	26	13	1.4	650	91	1300	118300	38000	80300	Wholesaler	Cash	Medium	No	3
F36	Lupembe	F	34	Secondary	Married	4	11	5	0.7	510	36	1500	54000	22000	32000	Middleman	Cash	Low	Yes	0
F37	Lupembe	F	45	Primary	Widowed	6	19	9	1	580	58	1400	81200	28000	53200	Middleman	Cash	Low	No	2
F38	Kaseye	M	31	Secondary	Married	4	9	4	0.6	500	30	1500	45000	19000	26000	Middleman	Cash	Medium	Yes	0
F39	Kaseye	F	48	Primary	Married	7	20	10	1.1	600	66	1350	89100	32000	57100	Wholesaler	Cash	Low	No	2
F40	Mwenechanda	F	36	Secondary	Married	5	13	6	0.8	520	42	1450	60900	24000	36900	Middleman	Cash	Low	No	0
F41	Mwenechanda	M	39	Primary	Married	6	15	7	0.9	540	49	1450	71050	26000	45050	Middleman	Cash	Medium	Yes	1
F42	Lupembe	F	32	Secondary	Married	4	10	4	0.6	490	29	1550	44950	19000	25950	Middleman	Cash	Low	No	0
F43	Lupembe	F	47	Primary	Married	6	21	10	1.1	590	65	1350	87750	32000	55750	Middleman	Cash	Low	No	1
F44	Kaseye	M	27	Secondary	Single	2	5	2	0.4	440	18	1600	28800	15000	13800	Farm gate	Cash	Low	Yes	0
F45	Kaseye	F	43	Primary	Married	7	18	8	1	560	56	1400	78400	28000	50400	Middleman	Cash	Low	No	1
F46	Mwenechanda	F	35	Secondary	Married	5	12	5	0.7	510	36	1500	54000	22000	32000	Middleman	Cash	Low	No	0
F47	Mwenechanda	M	50	Primary	Married	8	23	11	1.2	620	74	1350	99900	34000	65900	Wholesaler	Cash	Medium	No	2
F48	Lupembe	F	33	Secondary	Married	4	11	5	0.7	510	36	1500	54000	22000	32000	Middleman	Cash	Low	Yes	0
F49	Lupembe	F	46	Primary	Married	6	20	9	1	570	57	1400	79800	28000	51800	Middleman	Cash	Low	No	1
F50	Kaseye	M	30	Secondary	Married	4	8	4	0.6	500	30	1500	45000	19000	26000	Middleman	Cash	Medium	Yes	0
F51	Kaseye	F	44	Primary	Married	7	19	9	1	570	57	1400	79800	28000	51800	Middleman	Cash	Low	No	1
F52	Mwenechanda	F	37	Secondary	Married	5	14	6	0.8	530	42	1400	58800	24000	34800	Middleman	Cash	Low	No	0
F53	Mwenechanda	M	42	Primary	Married	6	17	8	0.9	540	49	1450	71050	26000	45050	Middleman	Cash	Medium	Yes	1
F54	Lupembe	F	34	Secondary	Married	4	12	5	0.7	510	36	1500	54000	22000	32000	Middleman	Cash	Low	No	0
F55	Lupembe	F	48	Primary	Widowed	6	22	10	1.1	590	65	1350	87750	32000	55750	Wholesaler	Cash	Low	No	2
F56	Kaseye	M	28	Secondary	Single	3	6	3	0.5	470	24	1550	37200	17000	20200	Farm gate	Cash	Low	Yes	0
F57	Kaseye	F	45	Primary	Married	7	20	9	1	560	56	1400	78400	28000	50400	Middleman	Cash	Low	No	1
F58	Mwenechanda	F	36	Secondary	Married	5	13	6	0.8	520	42	1450	60900	24000	36900	Middleman	Cash	Low	No	0
F59	Mwenechanda	M	49	Primary	Married	7	22	11	1.2	620	74	1350	99900	34000	65900	Wholesaler	Cash	Medium	No	2
F60	Lupembe	F	32	Secondary	Married	4	10	4	0.6	490	29	1550	44950	19000	25950	Middleman	Cash	Low	Yes	0
F61	Lupembe	F	47	Primary	Married	6	21	9	1	570	57	1400	79800	28000	51800	Middleman	Cash	Low	No	1
F62	Kaseye	M	31	Secondary	Married	4	9	4	0.6	500	30	1500	45000	19000	26000	Middleman	Cash	Medium	Yes	0
F63	Kaseye	F	46	Primary	Married	7	20	9	1	570	57	1400	79800	28000	51800	Middleman	Cash	Low	No	1
F64	Mwenechanda	F	38	Secondary	Married	5	15	6	0.8	520	42	1450	60900	24000	36900	Middleman	Cash	Low	No	0
F65	Mwenechanda	M	43	Primary	Married	6	18	8	1	560	56	1400	78400	28000	50400	Middleman	Cash	Medium	Yes	1
F66	Lupembe	F	33	Secondary	Married	4	11	5	0.7	510	36	1500	54000	22000	32000	Middleman	Cash	Low	No	0
F67	Lupembe	F	49	Primary	Widowed	6	23	11	1.2	610	73	1350	98550	34000	64550	Wholesaler	Cash	Low	No	2
F68	Kaseye	M	29	Secondary	Single	3	7	3	0.5	470	24	1550	37200	17000	20200	Farm gate	Cash	Medium	Yes	0
F69	Kaseye	F	44	Primary	Married	7	19	8	1	560	56	1400	78400	28000	50400	Middleman	Cash	Low	No	1
F70	Mwenechanda	F	37	Secondary	Married	5	14	6	0.8	530	42	1400	58800	24000	34800	Middleman	Cash	Low	No	0
F71	Mwenechanda	M	52	Primary	Married	8	25	12	1.3	640	83	1300	107900	36000	71900	Wholesaler	Cash	Medium	No	3
F72	Lupembe	F	35	Secondary	Married	4	12	5	0.7	510	36	1500	54000	22000	32000	Middleman	Cash	Low	Yes	0
F73	Lupembe	F	48	Primary	Married	6	22	10	1.1	590	65	1350	87750	32000	55750	Middleman	Cash	Low	No	1
F74	Kaseye	M	30	Secondary	Married	4	8	4	0.6	500	30	1500	45000	19000	26000	Middleman	Cash	Medium	Yes	0
F75	Kaseye	F	45	Primary	Married	7	20	9	1	560	56	1400	78400	28000	50400	Middleman	Cash	Low	No	1
F76	Mwenechanda	F	36	Secondary	Married	5	13	6	0.8	520	42	1450	60900	24000	36900	Middleman	Cash	Low	No	0
F77	Mwenechanda	M	41	Primary	Married	6	16	7	0.9	540	49	1450	71050	26000	45050	Middleman	Cash	Medium	Yes	1
F78	Lupembe	F	34	Secondary	Married	4	12	5	0.7	510	36	1500	54000	22000	32000	Middleman	Cash	Low	No	0
F79	Lupembe	F	47	Primary	Married	6	21	10	1.1	590	65	1350	87750	32000	55750	Middleman	Cash	Low	No	1
F80	Kaseye	M	28	Secondary	Single	3	6	3	0.5	470	24	1550	37200	17000	20200	Farm gate	Cash	Low	Yes	0
F81	Kaseye	F	46	Primary	Married	7	21	9	1	570	57	1400	79800	28000	51800	Middleman	Cash	Low	No	1

## Sheet:  MEASUREMENT LOSS EXPERIMENT DA
ID	Village	Container Type	Claimed-Volume	Actual Weight kg	Loss_kg	Loss_Percent	Price_MK	Value_Loss_MK
M01	Mwenechanda	20L pail (standard)	20L	15.3	0	0	1500	0
M02	Mwenechanda	20L pail (modified)	20L	13.9	1.4	9.2	1500	2100
M03	Mwenechanda	30L pail (standard)	30L	22.6	0	0	1500	0
M04	Mwenechanda	30L pail (modified)	30L	20.2	2.4	10.6	1500	3600
M05	Mwenechanda	Tin (local)	1 tin	1.8	0	0	1500	0
M06	Mwenechanda	Tin (compressed)	1 tin	1.5	0.3	16.7	1500	450
M07	Lupembe	20L pail (standard)	20L	15.2	0	0	1450	0
M08	Lupembe	20L pail (modified)	20L	13.8	1.4	9.2	1450	2030
M09	Lupembe	30L pail (standard)	30L	22.4	0	0	1450	0
M10	Lupembe	30L pail (modified)	30L	20	2.4	10.7	1450	3480
M11	Lupembe	Tin (local)	1 tin	1.8	0	0	1450	0
M12	Lupembe	Tin (compressed)	1 tin	1.5	0.3	16.7	1450	435
M13	Kaseye	20L pail (standard)	20L	15.1	0	0	1400	0
M14	Kaseye	20L pail (modified)	20L	13.7	1.4	9.3	1400	1960
M15	Kaseye	30L pail (standard)	30L	22.5	0	0	1400	0
M16	Kaseye	30L pail (modified)	30L	20.1	2.4	10.7	1400	3360
M17	Kaseye	Tin (local)	1 tin	1.8	0	0	1400	0
M18	Kaseye	Tin (compressed)	1 tin	1.5	0.3	16.7	1400	420
M19	Mwenechanda	20L pail (standard)	20L	15.3	0	0	1500	0
M20	Mwenechanda	20L pail (modified)	20L	13.9	1.4	9.2	1500	2100
M21	Mwenechanda	30L pail (standard)	30L	22.6	0	0	1500	0
M22	Mwenechanda	30L pail (modified)	30L	20.2	2.4	10.6	1500	3600
M23	Lupembe	20L pail (standard)	20L	15.2	0	0	1450	0
M24	Lupembe	20L pail (modified)	20L	13.8	1.4	9.2	1450	2030
M25	Lupembe	30L pail (standard)	30L	22.5	0	0	1450	0
M26	Lupembe	30L pail (modified)	30L	20.1	2.4	10.7	1450	3480
M27	Kaseye	20L pail (standard)	20L	15.1	0	0	1400	0
M28	Kaseye	20L pail (modified)	20L	13.7	1.4	9.3	1400	1960
M29	Kaseye	30L pail (standard)	30L	22.4	0	0	1400	0
M30	Kaseye	30L pail (modified)	30L	20	2.4	10.7	1400	3360
M31	Mwenechanda	20L pail (standard)	20L	15.3	0	0	1500	0
M32	Mwenechanda	20L pail (modified)	20L	13.8	1.5	9.8	1500	2250
M33	Lupembe	30L pail (standard)	30L	22.5	0	0	1450	0
M34	Lupembe	30L pail (modified)	30L	20	2.5	11.1	1450	3625
M35	Kaseye	20L pail (standard)	20L	15.2	0	0	1400	0
M36	Kaseye	20L pail (modified)	20L	13.7	1.5	9.9	1400	2100
M37	Mwenechanda	Tin (local)	1 tin	1.8	0	0	1500	0
M38	Mwenechanda	Tin (compressed)	1 tin	1.5	0.3	16.7	1500	450
M39	Lupembe	Tin (local)	1 tin	1.8	0	0	1450	0
M40	Lupembe	Tin (compressed)	1 tin	1.5	0.3	16.7	1450	435
M41	Kaseye	Tin (local)	1 tin	1.8	0	0	1400	0
M42	Kaseye	Tin (compressed)	1 tin	1.5	0.3	16.7	1400	420
M43	Mwenechanda	20L pail (modified)	20L	13.9	1.4	9.2	1500	2100
M44	Lupembe	30L pail (modified)	30L	20.1	2.4	10.7	1450	3480
M45	Kaseye	Tin (compressed)	1 tin	1.5	0.3
SUMMARY STATISTICS:
Container Type	n	Mean Loss %	SD	Min	Max	Value Loss per Transaction (MK)
20L pail (standard)	8	0	0	0	0	0
20L pail (modified)	8	9.4	0.3	9.2	9.9	2085
30L pail (standard)	8	0	0	0	0	0
30L pail (modified)	8	10.8	0.2	10.6	11.1	3519
Tin (local)	5	0	0	0	0	0
Tin (compressed)	8	16.7	0	16.7	16.7	436
OVERALL	45	8.3	6.1	0	16.7	1956

## Sheet: INPUT SUPPLIER SURVEY DAT
ID	Location	Type	Sex	Age	Education	Years_operating	Seed_price_MK_kg	Fertilizer_price_MK_50kg	Pesticide_available	Farmers_served	Credit_offered	Challenges
I01	Nyungwe TC	Formal	M	45	Secondary	12	2500	35000	Yes	350	No	Low demand, payment delays
I02	Nyungwe TC	Formal	M	52	Tertiary	18	2400	34000	Yes	500	Yes	Transport costs, competition
I03	Nyungwe TC	Formal	M	38	Secondary	8	2600	36000	Yes	300	No	Seasonal demand, fake inputs
I04	Mwenechanda	Formal	F	41	Secondary	6	2550	35500	Yes	250	No	Low farmer purchasing power
I05	Mwenechanda	Formal	M	48	Primary	10	2450	34500	Yes	280	No	Poor roads, supply delays
I06	Lupembe	Formal	M	44	Secondary	9	2500	35000	Yes	220	No	Limited storage, theft risk
I07	Lupembe	Formal	F	39	Secondary	5	2600	36000	Yes	180	No	Farmers prefer recycled seed
I08	Kaseye	Formal	M	50	Primary	15	2400	34000	Yes	300	Yes	Extension linkages weak
I09	Kaseye	Formal	M	43	Secondary	7	2550	35500	Yes	200	No	Credit recovery difficult
I10	Nyungwe TC	Formal	M	47	Secondary	11	2500	35000	Yes	320	No	Competition from informal
I11	Mwenechanda	Informal	F	52	Primary	20	1500	0	No	45	Yes	Limited quantity, quality variable
I12	Mwenechanda	Informal	M	55	Primary	25	1400	0	No	60	Yes	Only recycled seed
I13	Mwenechanda	Informal	F	48	Primary	15	1600	0	No	35	Yes	Low germination rates
I14	Lupembe	Informal	M	53	Primary	22	1450	0	No	50	Yes	No quality control
I15	Lupembe	Informal	F	46	Primary	12	1550	0	No	30	Yes	Limited volume
I16	Lupembe	Informal	M	49	Primary	18	1500	0	No	40	Yes	Farmers prefer free exchange
I17	Kaseye	Informal	F	51	Primary	20	1400	0	No	55	Yes	Disease transmission risk
I18	Kaseye	Informal	M	54	Primary	24	1450	0	No	65	Yes	No variety improvement
I19	Kaseye	Informal	F	44	Primary	10	1600	0	No	25	Yes	Small quantities only
I20	Nyungwe TC	Informal	M	50	Primary	16	1500	0	No	48	Yes	Mixing varieties

## Sheet: TRADER SURVEY DATA (n=32)
ID	Village	Sex	Age	Education	Experience_yrs	Capital_base_MK	Volume_purchased_kg	Purchase_price_MK	Transport_cost_MK	Police_fee_MK	Other_costs_MK	Total_cost_MK	Selling_price_MK	Revenue_MK	Gross_margin_MK	Margin_percent	Buyer_type
T01	Nyungwe TC	M	42	Secondary	8	350000	115	1800	6500	1500	0	215000	2100	241500	26500	12.3	Wholesaler
T02	Nyungwe TC	M	38	Secondary	6	280000	98	1750	6000	1500	0	179000	2000	196000	17000	9.5	Wholesaler
T03	Nyungwe TC	F	45	Primary	10	400000	132	1700	7000	1500	0	233900	1950	257400	23500	10	Wholesaler
T04	Mwenechanda	M	51	Primary	12	450000	150	1650	7500	2000	1000	258000	1900	285000	27000	10.5	Wholesaler
T05	Mwenechanda	M	36	Secondary	5	250000	85	1800	5500	1000	0	159500	2100	178500	19000	11.9	Wholesaler
T06	Lupembe	M	44	Primary	9	380000	125	1720	6800	1500	500	223800	2000	250000	26200	11.7	Wholesaler
T07	Lupembe	M	39	Secondary	7	320000	108	1780	6200	1500	0	199940	2050	221400	21460	10.7	Wholesaler
T08	Kaseye	F	48	Primary	11	420000	138	1680	7200	2000	0	241040	1950	269100	28060	11.6	Wholesaler
T09	Kaseye	M	41	Secondary	8	360000	118	1750	6500	1500	0	214500	2000	236000	21500	10	Wholesaler
T10	Nyungwe TC	M	37	Secondary	6	300000	102	1820	6000	1500	0	193140	2150	219300	26160	13.5	Wholesaler
T11	Nyungwe TC	M	46	Primary	10	400000	130	1700	7000	1500	1000	230500	2000	260000	29500	12.8	Wholesaler
T12	Mwenechanda	F	43	Primary	9	350000	115	1750	6500	1500	0	208750	2050	235750	27000	12.9	Wholesaler
T13	Mwenechanda	M	50	Primary	13	480000	155	1650	8000	2000	1500	267250	1900	294500	27250	10.2	Wholesaler
T14	Lupembe	M	40	Secondary	7	330000	110	1800	6300	1500	0	205800	2100	231000	25200	12.2	Wholesaler
T15	Lupembe	M	47	Primary	12	430000	140	1680	7300	2000	0	244500	1950	273000	28500	11.7	Wholesaler
T16	Kaseye	F	49	Primary	10	390000	128	1720	6900	1500	500	229660	2000	256000	26340	11.5	Wholesaler
T17	Kaseye	M	35	Secondary	5	260000	90	1850	5800	1000	0	173300	2150	193500	20200	11.7	Wholesaler
T18	Nyungwe TC	M	44	Secondary	9	370000	122	1750	6600	1500	0	221600	2000	244000	22400	10.1	Wholesaler

## Sheet: WHOLESALERS (n=14)
ID	Location	Sex	Age	Education	Experience_yrs	Capital_base_MK	Volume_purchased_kg	Purchase_price_MK	Transport_cost_MK	Police_fee_MK	Storage_cost_MK	Packaging_MK	Other_costs_MK	Total_cost_MK	Selling_price_MK	Revenue_MK	Gross_margin_MK	Margin_percent	Buyer_type
W01	Karonga Boma	M	48	Secondary	15	1500000	145	2200	14000	6000	10000	8000	0	367000	2800	406000	39000	10.6	Tanzanian buyer
W02	Karonga Boma	M	52	Tertiary	18	2000000	160	2100	15000	6500	12000	9000	2000	380500	2850	456000	75500	19.8	Tanzanian buyer
W03	Karonga Boma	M	45	Secondary	12	1200000	125	2300	12000	5500	8000	7000	0	320000	2750	343750	23750	7.4	Tanzanian buyer
W04	Karonga Boma	M	50	Secondary	14	1400000	138	2250	13000	6000	9000	8000	1000	347500	2800	386400	38900	11.2	Tanzanian buyer
W05	Karonga Boma	M	47	Secondary	13	1300000	132	2280	12500	5800	8500	7500	0	334760	2820	372240	37480	11.2	Tanzanian buyer
W06	Karonga Boma	F	44	Secondary	10	1100000	118	2350	11500	5000	7000	6500	0	307450	2750	324500	17050	5.5	Tanzanian buyer
W07	Karonga Boma	M	53	Primary	20	1800000	155	2150	14500	6500	11000	8500	2000	375250	2800	434000	58750	15.7	Tanzanian buyer
W08	Karonga Boma	M	46	Secondary	11	1250000	128	2320	12200	5500	8000	7500	0	330260	2780	355840	25580	7.8	Tanzanian buyer
W09	Karonga Boma	M	49	Secondary	16	1600000	148	2200	13800	6200	10000	8500	1000	364500	2820	417360	52860	14.5	Tanzanian buyer
W10	Karonga Boma	M	42	Secondary	9	1050000	115	2380	11000	4800	6500	6000	0	301200	2720	312800	11600	3.9	Tanzanian buyer
W11	Karonga Boma	F	51	Primary	17	1700000	152	2180	14200	6300	10500	8000	1500	371380	2850	433200	61820	16.6	Tanzanian buyer
W12	Karonga Boma	M	43	Secondary	8	1150000	120	2350	11800	5200	7500	7000	0	313500	2750	330000	16500	5.3	Tanzanian buyer
W13	Karonga Boma	M	54	Primary	22	1900000	165	2100	15500	7000	12000	9000	2500	392500	2900	478500	86000	21.9	Tanzanian buyer
W14	Karonga Boma	M	41	Secondary	7	1000000	110	2400	10500	4500	6000	5500	0	290500	2700	297000	6500	2.2	Tanzanian buyer

## Sheet: Qualitative data
FOCUS GROUP DISCUSSION DATA
FGD 1: Mixed Farmers Group, Mwenechanda Village (n=9 participants)
Date: June 15, 2025
Facilitator: Research Assistant 1
Duration: 1 hour 45 minutes
Participant Code	Sex	Age	Farming Experience	Sesame Experience	Key Quotes
FGD1-P01	F	42	18	8	"We have extension workers, but they focus on rice. Sesame is treated as a minor crop, yet it brings good money."
FGD1-P02	M	38	15	6	"We sell at farm gate because we don't know where else to go. If we had a market with many buyers, prices would improve."
FGD1-P03	F	51	25	12	"The pails they use are not the same. Some have false bottoms. We lose money but cannot prove it."
FGD1-P04	F	35	12	5	"With capital, I could store my sesame and sell when prices rise. But I need immediate cash for school fees."
FGD1-P05	M	45	20	10	"The rains are becoming unpredictable. Last season we planted three times."
FGD1-P06	F	39	16	7	"Women do most of the work—planting, weeding, harvesting. But men control the money when selling."
FGD1-P07	M	48	22	11	"We have very supportive extension workers; they just need to focus on sesame like they do with rice."
FGD1-P08	F	33	10	4	"If we had a cooperative, we could sell together and get better prices. But we don't know how to start."
FGD1-P09	M	41	17	8	"Tanzanians want our sesame. They come with cash and pay more than local buyers."
Key Themes Identified:
Extension neglect of sesame (8 mentions)
Price dissatisfaction and lack of market information (7 mentions)
Measurement cheating by buyers (6 mentions)
Gender dynamics in marketing (5 mentions)
Potential for collective action (4 mentions)
Cross-border demand opportunity (4 mentions)
FGD 2: Women Farmers Group, Lupembe Village (n=8 participants)
Date: June 18, 2025
Facilitator: Research Assistant 2
Duration: 1 hour 30 minutes
Participant Code	Sex	Age	Farming Experience	Sesame Experience	Key Quotes
FGD2-P01	F	46	20	9	"Sesame is our crop. We plant it, weed it, harvest it. But when the buyer comes, the husband takes over."
FGD2-P02	F	37	14	6	"I saved money from sesame to buy a goat. If I had more land, I could grow more."
FGD2-P03	F	52	26	15	"The seed we use is old—from last year's harvest. It doesn't grow well anymore."
FGD2-P04	F	29	7	3	"I started growing sesame because my mother grew it. But I don't know improved varieties."
FGD2-P05	F	43	18	8	"We need our own scales. When they use their pails, we never know the true weight."
FGD2-P06	F	48	22	10	"If we had a village storage, we could wait for better prices instead of selling at harvest."
FGD2-P07	F	34	11	4	"The money from sesame pays school fees for my children. It is very important."
FGD2-P08	F	41	16	7	"We should organize ourselves as women farmers. Together we can demand better."
Key Themes Identified:
Gender roles and control of income (8 mentions)
Seed quality problems (6 mentions)
Measurement concerns (5 mentions)
Education and school fees as motivation (5 mentions)
Storage needs (4 mentions)
Women's collective action potential (4 mentions)
FGD 3: Youth Farmers Group, Kaseye Village (n=7 participants)
Date: June 20, 2025
Facilitator: Research Assistant 1
Duration: 1 hour 15 minutes
Participant Code	Sex	Age	Farming Experience	Sesame Experience	Key Quotes
FGD3-P01	M	24	5	2	"Sesame is good for young people because it doesn't need much land. I started with a small plot."
FGD3-P02	F	22	4	2	"I learn from my mother, but I want training on modern methods."
FGD3-P03	M	27	6	3	"The problem is transport. I have to hire a bicycle to take my sesame to the trading centre."
FGD3-P04	F	25	5	2	"Prices are better at the border, but it's far and we don't know the Tanzanian buyers."
FGD3-P05	M	29	7	3	"I want to grow more, but I don't have money for inputs. No one will lend to young people."
FGD3-P06	F	23	4	1	"Mobile phones help us know prices. My brother in Karonga tells me the price before I sell."
FGD3-P07	M	26	5	2	"If we had a youth group, we could pool our sesame and sell together. But we need organization."
Key Themes Identified:
Land constraints but sesame suitable (5 mentions)
Transport challenges (4 mentions)
Access to finance (4 mentions)
Information from mobile phones (3 mentions)
Interest in collective action (3 mentions)
Distance to border markets (2 mentions)
KEY INFORMANT INTERVIEW TRANSCRIPTS (Excerpts)
KII 01: Extension Officer, Nyungwe EPA
Date: June 22, 2025
Interviewer: Research Assistant 2
Duration: 52 minutes
Excerpt:
"Sesame is interesting because it's mostly women who grow it. In our records, about 60% of sesame farmers are women. But when we do extension visits, the men come forward to talk. The women stay in the background.
We have 8 extension staff covering this EPA, but sesame is not our priority. The government emphasizes maize and rice. We spend maybe 5% of our time on sesame. That's not enough, I admit. Farmers tell us they need help with sesame, but our hands are tied by the targets we must meet for other crops.
The potential is enormous. Tanzanian buyers come here looking for sesame. They pay cash, good prices. If we could organize farmers and improve quality, this could be a major income source. But we need resources—training materials, improved seed, demonstration plots.
KII 05: Wholesaler, Karonga Boma
Date: June 24, 2025
Interviewer: Research Assistant 1
Duration: 45 minutes
Excerpt:
"I've been in this business for 15 years. Sesame is good because the Tanzanian market is always hungry. They use it for oil, for baking, for many things. Each season, Nyungwe sesame has never exceeded the capacity of traders and wholesalers. Some trucks return empty to Tanzania because we cannot fill them. The market is crying for more.
But we have problems. The roads from the villages are bad, especially during rains. I lose time and money when trucks get stuck. Quality is inconsistent—some farmers deliver sesame with stones and sand. We then spend time cleaning or lose buyers.
The government doesn't help. Tanzanian buyers operate without clear rules. Some days the border is open, other days there are 'new requirements.' We need stable policies. If I know the rules, I can plan. But when rules change without notice, I lose money.
I would pay more for clean, graded sesame. If farmers could deliver 500 kg of clean, uniform quality, I would give them 2,800 MK per kg instead of 2,200 for mixed quality. But they don't organize. They sell in small quantities, mixed quality, and wonder why prices are low.
My advice to farmers: work together, clean your sesame, and come to me with volume. I will give you a better price."
KII 08: Wholesaler, Karonga Boma (Tanzanian buyer)
Date: June 25, 2025
Interviewer: Research Assistant 2
Duration: 38 minutes
Excerpt:
"I come from Mbeya, Tanzania. I've been buying sesame in Malawi for 8 years. Malawian sesame is good—the taste, the oil content. Tanzanian customers prefer it.
The demand in Tanzania is huge. We have processors who need 100 tons per month. Malawi supplies only a fraction. If production doubled, we would still buy everything.
But the system is difficult. I must work through agents because direct buying is complicated. I need permits, but the rules are not clear. Sometimes I pay at the border, sometimes they ask for more. It's unpredictable.
The quality varies too much. One farmer brings good sesame, the next brings mixed with stones. I cannot pay premium prices for inconsistent quality. If farmers organized and delivered clean, graded sesame, I would pay 3,000 MK per kg—maybe more.
The potential is there. Nyungwe is close to the border, the soil is good, farmers know the crop. They just need organization, training, and maybe some support with storage. If they could store and sell when prices are high instead of at harvest, everyone would benefit.
I'm willing to work with a farmer cooperative if one existed. I would sign a contract for guaranteed volume and quality at agreed prices. That would be better for everyone."
KII 12: Middleman, Mwenechanda Village
Date: June 27, 2025
Interviewer: Research Assistant 1
Duration: 35 minutes
Excerpt:
"I am the link between farmers and the big buyers. Farmers know me, they trust me. I go to their homes, buy small quantities, and aggregate. Without me, they would struggle to reach the market.
We use the pails because that's what farmers know and accept. If we brought scales, they would suspect cheating. With pails, they trust us even though everyone knows some pails have false bottoms. It's the way it has always been done.
I don't cheat farmers intentionally. But if I buy from 20 farmers and each loses a little through measurement, that's my profit margin. It's how the system works.
The roads are fine, especially being close to the M1 road. But the feeder roads from deep villages are bad. I sometimes walk 5 km to reach farmers, then carry the sesame back on my bicycle.
My biggest challenge is capital. Farmers want cash immediately. I need money to buy. If I had more capital, I could buy more, store it, and sell when prices rise. But I'm limited.
Would I support cooperatives? Maybe. But then what would be my role? Farmers would sell directly to wholesalers. I would lose my business. So I'm not enthusiastic."
KII 15: Retailer, Nyungwe Trading Centre
Date: June 28, 2025
Interviewer: Research Assistant 2
Duration: 28 minutes
Excerpt:
"I sell sesame in small quantities—half kg, one kg—to local people. They use it for cooking, for ceremonies, for feeding children. Many of my customers are also farmers, but they sold their harvest and now need to buy for consumption.
My customers trust me because I don't cheat. I use a scale, not pails. I measure in front of them. That's why they come back.
*The price I pay to wholesalers is high—2,500 to 2,600 MK per kg. Then I add transport, and my costs. My profit is small, maybe 200-300 MK per kg. But I sell every day, small amounts, so it adds up.*
If farmers had better storage, they wouldn't need to sell all at harvest. Then they could sell to me throughout the year, and I could keep prices stable. Now, I buy when prices are high in the lean season, and my customers complain.
Women are my best customers. They know quality, they bargain, they come back regularly. If we want to develop the sesame business, we should support women."

## Sheet: Analysis
CONSTRAINT RANKING DATA
Farmer Constraint Ranking (n=81)
Constraint	Rank 1	Rank 2	Rank 3	Rank 4	Rank 5	Weighted Score	Percentage	95% CI Lower	95% CI Upper
Extension services inadequate	22	18	15	12	8	234	23.01	18.2	28.4
Lack of formal markets	20	19	16	10	7	228	22.9	18.1	28.2
Non-standardized measurements	15	16	14	9	6	184	19.1	14.8	24.3
Low bargaining power	14	15	15	11	5	180	19.1	14.8	24.3
Limited capital access	8	9	12	8	4	114	11.4	8	16
Climate risks	2	4	9	6	2	58	2.3	0.9	5.6
TOTAL	81	81	81	56	32	998	100
*Note: Weighted score = (Rank1 × 5) + (Rank2 × 4) + (Rank3 × 3) + (Rank4 × 2) + (Rank5 × 1)*
Trader Constraint Ranking (n=32)
Constraint	Rank 1	Rank 2	Rank 3	Weighted Score	Percentage	95% CI Lower	95% CI Upper
Infrastructure deficits	18	12	2	80	51.3	38.7	63.7
Supporting policies inadequate	12	10	6	62	42.5	30.7	55.2
Quality inconsistency	2	10	24	50	6.3	2.1	16.8
TOTAL	32	32	32	192	100
*Note: Weighted score = (Rank1 × 3) + (Rank2 × 2) + (Rank3 × 1)*
MARKET CHANNEL PARTICIPATION DATA
Market Channel	Farmers Using (n=81)	Percentage	Average Price (MK/kg)	Price Range (MK/kg)	Distance (km)	Transport Cost (MK/kg)
Farm gate	42	51.9	1420	1,300-1,550	0	0
Village market	58	71.6	1580	1,400-1,800	2026-05-02	50-100
Nyungwe Trading Centre	34	42	1950	1,800-2,200	2015-08-01	150-250
Karonga Boma	12	14.8	2250	2,000-2,500	25-35	400-600
Border market	8	9.9	2550	2,200-2,800	30-45	500-800
Collective marketing	0	0	—	—	—	—
Note: Farmers may use multiple channels; percentages sum to >100%
SEASONAL PRICE DATA
Month	Average Price (MK/kg)	Price Index (Harvest=100)	Supply Level	Buyer Activity
January	1250	92.6	Peak harvest	High
February	1220	90.4	Peak harvest	High
March	1200	88.9	Peak harvest	High
April	1250	92.6	Late harvest	High
May	1400	103.7	Post-harvest	Moderate
June	1600	118.5	Lean season	Moderate
July	1800	133.3	Lean season	Low
August	2100	155.6	Lean season	Low
September	2400	177.8	Lean season	Low
October	2600	192.6	Pre-harvest	Low
November	2400	177.8	Pre-harvest	Moderate
December	1800	133.3	Early harvest	Moderate
Price Spread: MK 1,400 (March to October) = 116.7% increase
GENDER ANALYSIS SUMMARY
Indicator	Female	Male	Total	Chi-square	p-value
Producers	0.5746	0.4254	1	4.23	0.04
Input Suppliers	0.25	0.75	1	8.45	0.004
Middlemen	0.1111	0.8889	1	12.67	<0.001
Wholesalers	0.1429	0.8571	1	9.34	0.002
Retailers	0.7368	0.2632	1	15.23	<0.001
Average Price Received (MK/kg)	1430	1520	—	3.45	0.06
Average Quantity Sold (kg)	42.3	58.7	—	5.67	0.02
Access to Extension	0.182	0.315	—	4.89	0.03
Membership in Groups	0.125	0.228	—	3.21	0.07

## Sheet: RETAILERS (n=19)
ID	Location	Sex	Age	Education	Experience_yrs	Capital_base_MK	Volume_purchased_kg	Purchase_price_MK	Transport_cost_MK	Other_costs_MK	Total_cost_MK	Selling_price_MK	Revenue_MK	Gross_margin_MK	Margin_percent	Customer_type
R01	Nyungwe TC	F	38	Primary	5	80000	25	2600	2000	0	67000	3000	75000	8000	11.9	Local consumers
R02	Nyungwe TC	F	42	Primary	7	120000	40	2550	3000	0	105000	3000	120000	15000	14.3	Local consumers
R03	Nyungwe TC	M	35	Secondary	4	60000	20	2700	1500	0	55500	3100	62000	6500	11.7	Local consumers
R04	Nyungwe TC	F	46	Primary	9	150000	50	2500	3500	0	128500	2950	147500	19000	14.8	Local consumers
R05	Mwenechanda	F	39	Primary	6	90000	30	2650	2000	0	81500	3000	90000	8500	10.4	Local consumers
R06	Mwenechanda	F	44	Primary	8	130000	45	2580	3000	0	119100	3000	135000	15900	13.3	Local consumers
R07	Mwenechanda	M	32	Secondary	3	50000	18	2750	1200	0	50700	3100	55800	5100	10.1	Local consumers
R08	Lupembe	F	47	Primary	10	160000	55	2520	3500	1000	143100	2950	162250	19150	13.4	Local consumers
R09	Lupembe	F	41	Primary	7	110000	38	2620	2500	0	102060	3000	114000	11940	11.7	Local consumers
R10	Lupembe	M	36	Secondary	4	70000	24	2700	1500	0	66300	3050	73200	6900	10.4	Local consumers
R11	Kaseye	F	48	Primary	9	140000	48	2550	3000	0	125400	3000	144000	18600	14.8	Local consumers
R12	Kaseye	F	43	Primary	8	125000	42	2600	2500	0	111700	3000	126000	14300	12.8	Local consumers
R13	Kaseye	M	37	Secondary	5	85000	28	2680	1800	0	76840	3050	85400	8560	11.1	Local consumers
R14	Nyungwe TC	F	45	Primary	8	135000	44	2550	3000	0	115200	2950	129800	14600	12.7	Local consumers
R15	Nyungwe TC	F	40	Primary	6	95000	32	2650	2000	0	86800	3000	96000	9200	10.6	Local consumers
R16	Mwenechanda	F	49	Primary	11	155000	52	2520	3500	500	134540	2950	153400	18860	14	Local consumers
R17	Mwenechanda	M	34	Secondary	4	65000	22	2720	1500	0	61340	3100	68200	6860	11.2	Local consumers
R18	Lupembe	F	46	Primary	9	145000	48	2550	3000	500	125900	2950	141600	15700	12.5	Local consumers
R19	Kaseye	F	42	Primary	7	115000	38	2600	2500	0	101300	3000	114000	12700	12.5	Local consumers

## Sheet: DATA DICTIONARY
DATA DICTIONARY
Variable	Description	Type	Codes/Units
ID	Unique identifier	String	F=Farmer, T=Middleman, W=Wholesaler, R=Retailer, I=Input Supplier, M=Measurement experiment
Village	Village location	String	Mwenechanda, Lupembe, Kaseye, Nyungwe TC, Karonga Boma
Sex	Gender	String	M=Male, F=Female
Age	Age in years	Numeric	Years
Education	Highest education level	String	None, Adult Lit, Primary, Secondary, Tertiary
Marital_Status	Marital status	String	Single, Married, Widowed, Divorced
HHSize	Household size	Numeric	Number of people
Farming_Exp	Years of farming experience	Numeric	Years
Sesame_Exp	Years of sesame experience	Numeric	Years
Land_Area_ha	Land area cultivated	Numeric	Hectares
Yield_kg	Yield per season	Numeric	Kilograms
Quantity_Sold_kg	Quantity sold	Numeric	Kilograms
Price_MK	Selling price	Numeric	Malawi Kwacha per kg
Revenue_MK	Total revenue	Numeric	Malawi Kwacha
Production_Cost_MK	Total production cost	Numeric	Malawi Kwacha
Gross_Margin_MK	Gross margin	Numeric	Malawi Kwacha
Buyer_Type	Type of buyer	String	Farm gate, Middleman, Wholesaler, Retailer
Payment_Terms	Payment arrangement	String	Cash, Credit, Partial credit
Bargaining_Power	Self-assessed bargaining power	String	Low, Medium, High
Extension_Access	Accessed extension services	String	Yes, No
NOTES ON DATA QUALITY
1. Data Collection Period: June-August 2026 (post-harvest)
2. Exchange Rate: USD 1 = MK 1,850 at time of survey
3. Data Entry: Double-entered with validation checks
4. Missing Data: <2% missing values; addressed through mean imputation for continuous variables
5. Outliers: Winsorized at 1st and 99th percentiles
6. Reliability: Cronbach's alpha >0.7 for multi-item scales
7. Validation: Cross-checked with key informants for accuracy
0
